# Supplementary material for: Ras, TrkB, and ShcA Protein Expression Patterns in Pediatric Brain Tumors
Source: MDPI journal article supplement (doi:10.3390/jcm10102219), 2021-05-20
Supplement: s1 [file s1]

Supplementary Table 1. Tumor type, WHO grade, localization, age, year of diagnosis, gender of pediatric brain tumors donors (part 1)

| Pediatric brain tumors |                                                | WHO grade | Localization                           | Age (Y) | Sex | Year of diagnosis |
|------------------------|------------------------------------------------|-----------|----------------------------------------|---------|-----|-------------------|
| Group 1                | Choroid plexus tumors                          |           |                                        |         |     |                   |
|                        | choroid plexus papilloma (CPP)                 | G I       | fourth ventricle                       | 16      | F   | 2010              |
|                        | choroid plexus papilloma (CPP)                 | G I       | lateral ventricle                      | 9       | M   | 2012              |
|                        | choroid plexus papilloma (CPP)                 | G I       | lateral ventricle                      | 1       | F   | 2012              |
|                        | choroid plexus carcinoma (CPC)                 | G III     | lateral and fourth ventricles          | 3       | F   | 2014              |
|                        | choroid plexus carcinoma (CPC)                 | G III     | lateral ventricle                      | 9       | M   | 2014              |
|                        | choroid plexus carcinoma (CPC)                 | G III     | lateral and fourth ventricles          | 1       | M   | 2012              |
| Group 2                | Diffuse astrocytic and oligodendroglial tumors |           |                                        |         |     |                   |
|                        | Glioblastoma (GB)                              | G IV      | temporal lobe                          | 11      | F   | 2009              |
|                        | Glioblastoma (GB)                              | G IV      | temporal lobe                          | 11      | F   | 2011              |
|                        | Glioblastoma (GB)                              | G IV      | temporal lobe                          | 6       | M   | 2013              |
|                        | pediatric type oligodendroglioma               | G II      | thalamus                               | 13      | M   | 2014              |
|                        | pediatric type oligodendroglioma               | G II      | hippocampus                            | 2       | M   | 2013              |
|                        | pediatric type oligodendroglioma               | G II      | temporal lobe                          | 1       | M   | 2011              |
|                        | pediatric type oligodendroglioma               | G II      | parietal lobe                          | 10      | M   | 2011              |
|                        | pediatric type anaplastic oligodendroglioma    | G III     | occipital lobe                         | 3       | F   | 2012              |
|                        | pediatric type anaplastic oligodendroglioma    | G III     | occipital lobe                         | 12      | F   | 2011              |
|                        | pediatric type anaplastic oligodendroglioma    | G III     | occipital lobe                         | 5       | F   | 2011              |
| Group 3                | Embryonal tumors                               |           |                                        |         |     |                   |
|                        | medulloblastoma classic type (MB)              | G IV      | fourth ventricle                       | 15      | F   | 2012              |
|                        | medulloblastoma classic type (MB)              | G IV      | fourth ventricle                       | 5       | M   | 2013              |
|                        | medulloblastoma classic type (MB)              | G IV      | posterior fossa                        | 6       | M   | 2012              |
|                        | medulloblastoma classic type (MB)              | G IV      | posterior fossa                        | 6       | M   | 2013              |
|                        | medulloblastoma classic type (MB)              | G IV      | posterior fossa                        | 7       | F   | 2014              |
|                        | medulloblastoma classic type (MB)              | G IV      | fourth ventricle                       | 4       | M   | 2012              |
|                        | medulloblastoma classic type (MB)              | G IV      | fourth ventricle                       | 13      | M   | 2012              |
|                        | medulloblastoma classic type (MB)              | G IV      | fourth ventricle                       | 12      | M   | 2009              |
|                        | medulloblastoma classic type (MB)              | G IV      | posterior fossa                        | 2       | F   | 2013              |
|                        | medulloblastoma classic type (MB)              | G IV      | fourth ventricle                       | 2       | F   | 2010              |
|                        | embryonal tumor NOS                            | G IV      | third ventricle                        | 4       | F   | 2014              |
|                        | embryonal tumor NOS                            | G IV      | frontal lobe                           | 4       | F   | 2013              |
|                        | embryonal tumor NOS                            | G IV      | parietal lobe                          | 4       | M   | 2009              |
|                        | atypical teratoid rhabdoid tumor (ATRT)        | G IV      | temporal, parietal and occipital lobes | 1       | M   | 2014              |
|                        | atypical teratoid rhabdoid tumor (ATRT)        | G IV      | posterior fossa                        | 5       | F   | 2010              |
|                        | atypical teratoid/rhabdoid tumor (ATRT)        | G IV      | posterior fossa                        | 1       | F   | 2010              |

Supplementary Table 1. Tumor type, WHO grade, localization, age, year of diagnosis, gender of pediatric brain tumors donors (part 2)

| Pediatric brain tumors |                                            | WHO grade | Localization      | Age | Sex | Year of diagnosis |
|------------------------|--------------------------------------------|-----------|-------------------|-----|-----|-------------------|
| Group 4                | Ependymal tumors                           |           |                   |     |     |                   |
|                        | ependymoma                                 | G II      | posterior fossa   | 1   | M   | 2012              |
|                        | ependymoma                                 | G II      | posterior fossa   | 2   | F   | 2012              |
|                        | anaplastic ependymoma                      | G III     | posterior fossa   | 1   | M   | 2013              |
|                        | anaplastic ependymoma                      | G III     | posterior fossa   | 9   | F   | 2010              |
|                        | anaplastic ependymoma                      | G III     | posterior fossa   | 5   | M   | 2013              |
|                        | anaplastic ependymoma                      | G III     | posterior fossa   | 4   | F   | 2012              |
| Group 5                | Other astrocytic tumors                    |           |                   |     |     |                   |
|                        | pilocytic astrocytoma                      | G I       | cerebellum        | 14  | F   | 2013              |
|                        | pilocytic astrocytoma                      | G I       | cerebellum        | 3   | M   | 2013              |
|                        | pilocytic astrocytoma                      | G I       | cerebellum        | 17  | F   | 2011              |
|                        | pilocytic astrocytoma                      | G I       | cerebellum        | 4   | M   | 2011              |
|                        | pilomyxoid astrocytoma                     | G II      | third ventricle   | 2   | M   | 2010              |
|                        | pilomyxoid astrocytoma                     | G II      | third ventricle   | 5   | M   | 2011              |
|                        | pilomyxoid astrocytoma                     | G II      | third ventricle   | 4   | F   | 2011              |
|                        | pleomorphic xanthoastrocytoma (PXA)        | G II      | temporal lobe     | 9   | M   | 2009              |
|                        | pleomorphic xanthoastrocytoma (PXA)        | G II      | temporal lobe     | 13  | F   | 2013              |
|                        | pleomorphic xanthoastrocytoma (PXA)        | G II      | temporal lobe     | 17  | M   | 2010              |
|                        | supependymal giant cell astrocytoma (SEGA) | G I       | lateral ventricle | 14  | M   | 2013              |
|                        | supependymal giant cell astrocytoma (SEGA) | G I       | lateral ventricle | 6   | F   | 2011              |
|                        | supependymal giant cell astrocytoma (SEGA) | G I       | lateral ventricle | 7   | M   | 2010              |

Supplementary Table 2. Cytoplasmic expression of GFAP and Ki-67 labeling index in investigated pediatric brain tumors (part 1)

| Pediatric brain tumors |                                                | WHO grade | GFAP immunoreactivity | Ki67 LI |
|------------------------|------------------------------------------------|-----------|-----------------------|---------|
| Group 1                | Choroid plexus tumors                          |           |                       |         |
|                        | choroid plexus papilloma (CPP)                 | G I       | -                     | 1       |
|                        | choroid plexus papilloma (CPP)                 | G I       | -                     | 1       |
|                        | choroid plexus papilloma (CPP)                 | G I       | -                     | 1       |
|                        | choroid plexus carcinoma (CPC)                 | G III     | -                     | 25      |
|                        | choroid plexus carcinoma (CPC)                 | G III     | -                     | 20      |
|                        | choroid plexus carcinoma (CPC)                 | G III     | -                     | 20      |
| Group 2                | Diffuse astrocytic and oligodendroglial tumors |           |                       |         |
|                        | Glioblastoma (GB)                              | G IV      | +++                   | 60      |
|                        | Glioblastoma (GB)                              | G IV      | +++                   | 55      |
|                        | Glioblastoma (GB)                              | G IV      | +++                   | 50      |
|                        | pediatric type oligodendroglioma               | G II      | —                     | 1       |
|                        | pediatric type oligodendroglioma               | G II      | —                     | 2       |
|                        | pediatric type oligodendroglioma               | G II      | +                     | 1       |
|                        | pediatric type oligodendroglioma               | G II      | -                     | 2       |
|                        | pediatric type anaplastic oligodendroglioma    | G III     | ++                    | 40      |
|                        | pediatric type anaplastic oligodendroglioma    | G III     | -                     | 20      |
|                        | pediatric type anaplastic oligodendroglioma    | G III     | -                     | 20      |
| Group 3                | Embryonal tumors                               |           |                       |         |
|                        | Medulloblastoma classic type (MB)              | G IV      | -                     | 50      |
|                        | medulloblastoma classic type (MB)              | G IV      | -                     | 50      |
|                        | medulloblastoma classic type (MB)              | G IV      | -                     | 50      |
|                        | medulloblastoma classic type (MB)              | G IV      | -                     | 50      |
|                        | medulloblastoma classic type (MB)              | G IV      | -                     | 70      |
|                        | Medulloblastoma classic type (MB)              | G IV      | -                     | 70      |
|                        | medulloblastoma classic type (MB)              | G IV      | -                     | 70      |
|                        | medulloblastoma classic type (MB)              | G IV      | -                     | 60      |
|                        | medulloblastoma classic type (MB)              | G IV      | -                     | 80      |
|                        | medulloblastoma classic type (MB)              | G IV      | -                     | 50      |
|                        | embryonal tumor NOS                            | G IV      | +                     | 75      |
|                        | embryonal tumor NOS                            | G IV      | -                     | 70      |
|                        | embryonal tumor NOS                            | G IV      | -                     | 80      |
|                        | atypical teratoid rhabdoid tumor (ATRT)        | G IV      | +++                   | 80      |
|                        | atypical teratoid rhabdoid tumor (ATRT)        | G IV      | +                     | 75      |
|                        | atypical teratoid/rhabdoid tumor (ATRT)        | G IV      | +                     | 75      |

Cytoplasmic expression of glial fibrillary acid protein (GFAP) was assessed semiquantitatively as negative (-), low (+), moderate (++), and strong (+++), depending on the percentage of positive cells in microscopic examination.

Ki-67 labeling index expressed as percentage of nuclear expression of Ki-67 counted in 300 hot-spot neoplastic cells in high power microscopic fields (400x).

Supplementary Table 2. Cytoplasmic expression of GFAP and Ki-67 labeling index in investigated pediatric brain tumors (part 2)

| Pediatric brain tumors |                                            | WHO grade | GFAP immunoreactivity | Ki67 LI |
|------------------------|--------------------------------------------|-----------|-----------------------|---------|
| Group 4                | <b>Ependymal tumors</b>                    |           |                       |         |
|                        | ependymoma                                 | G II      | +++                   | 3       |
|                        | ependymoma                                 | G II      | ++                    | 3       |
|                        | anaplastic ependymoma                      | G III     | ++                    | 35      |
|                        | anaplastic ependymoma                      | G III     | ++                    | 30      |
|                        | anaplastic ependymoma                      | G III     | ++                    | 30      |
|                        | anaplastic ependymoma                      | G III     | ++                    | 35      |
| Group 5                | <b>Other astrocytic tumors</b>             |           |                       |         |
|                        | pilocytic astrocytoma                      | G I       | +++                   | 3       |
|                        | pilocytic astrocytoma                      | G I       | +++                   | 2       |
|                        | pilocytic astrocytoma                      | G I       | +++                   | 2       |
|                        | pilocytic astrocytoma                      | G I       | +++                   | 3       |
|                        | pilomyxoid astrocytoma                     | G II      | +++                   | 2       |
|                        | pilomyxoid astrocytoma                     | G II      | +++                   | 2       |
|                        | pilomyxoid astrocytoma                     | G II      | +++                   | 2       |
|                        | pleomorphic xanthoastrocytoma (PXA)        | G II      | +++                   | 2       |
|                        | pleomorphic xanthoastrocytoma (PXA)        | G II      | ++                    | 2       |
|                        | pleomorphic xanthoastrocytoma (PXA)        | G II      | ++                    | 1       |
|                        | supependymal giant cell astrocytoma (SEGA) | G I       | ++                    | 1       |
|                        | supependymal giant cell astrocytoma (SEGA) | G I       | ++                    | 1       |
|                        | supependymal giant cell astrocytoma (SEGA) | G I       | ++                    | 1       |

Cytoplasmic expression of glial fibrillary acid protein (GFAP) was assessed semiquantitatively as negative (-), low (+), moderate (++), and strong (+++), depending on the percentage of positive cells in microscopic examination.

Ki-67 labeling index expressed as percentage of nuclear expression of Ki-67 counted in 300 hot-spot neoplastic cells in high power microscopic fields (400x).
